# Supplementary material for: Dynamics and Patterning of 5-Hydroxytryptamine 2 Subtype Receptors in JC Polyomavirus Entry
Source: MDPI journal article supplement (doi:10.3390/v14122597), 2022-11-22
Supplement: s1 [file s1]

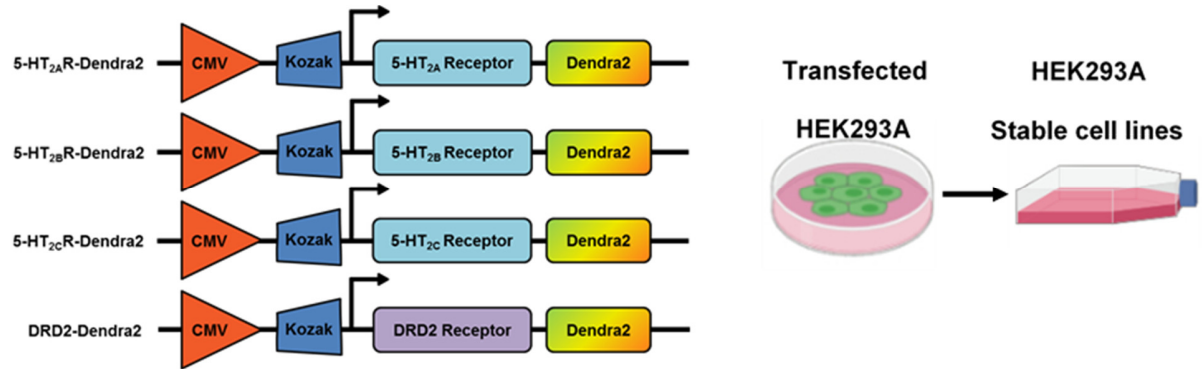

**Figure S1.** Generation of 5-HT<sub>2</sub>R constructs. Schematic configuration of 5-HT<sub>2</sub>R (5-HT<sub>2A</sub>, 5-HT<sub>2B</sub> and 5-HT<sub>2C</sub>) and DRD2-Dendra2 constructs used for generating stable HEK293A stable cell lines. Schematic created in BioRender.

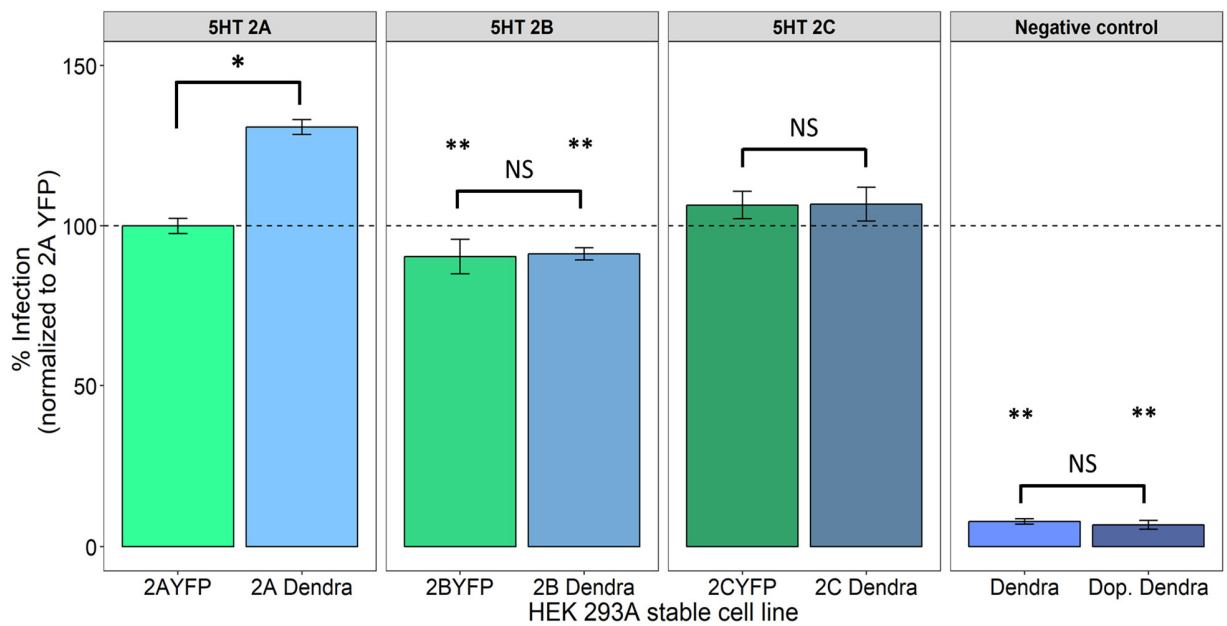

**Figure S2.** Infectivity assay for 5-HT<sub>2</sub>R-Dendra2 expressing HEK293A cells. HEK293A stable cell lines expressing 5-HT<sub>2</sub>R-Dendra2 constructs facilitates JCPyV infection. HEK293A cells, expressing 5-HT<sub>2</sub>R-YFP (5-HT<sub>2A</sub>R-YFP, 5-HT<sub>2B</sub>R-YFP and 5-HT<sub>2C</sub>R-YFP) and 5-HT<sub>2</sub>R-Dendra2 constructs, were infected with JCPyV (MOI= 2 FFU/cell) at 37°C for 48 hrs. Cells were fixed and stained for JCPyV T-Antigen (T-Ag) to measure infectivity. Infection was scored by the presence of nuclear T-Ag at 10x magnification for five fields of view per sample for triplicate samples. Data represent the average of three independent samples. Error bars represent SD. \*,  $p < 0.05$ ; NS, not significant; \*\*,  $p < 0.05$  vs 5-HT<sub>2A</sub>R-YFP.
